# Supplementary material for: Non–Small Cell Lung Cancer Cells Acquire Resistance to the ALK Inhibitor Alectinib by Activating Alternative Receptor Tyrosine Kinases
Source: Oxford University Press journal article supplement (doi:10.1158/0008-5472.can-15-1010), 2016-01-11
Supplement: 00085472can151010-sup-148188_2_supp_3229420_nxvzbv.docx [file 00085472can151010-sup-148188_2_supp_3229420_nxvzbv.docx]

| **Table S2. Probe and primer** | | | | | | |
| --- | --- | --- | --- | --- | --- | --- |
|  |  | | |  | | |
| **(A) Copy number analysis by qPCR** | | | | | | |
| **Gene** | |  | | | **Sequences** | |
| MET | | Probe | | | 5’-FAM-CGGAGACCCTTCACTTCGCAGGCA-TAMRA-3’ | |
| Forward | | | 5’ -CCAATTTCTGACCGAGGGAATC-3’ | |
| Reverse | | | 5’-TCCATGTTTCATGTATGGTAGGAC-3’ | |
|  | |  | | |  | |
| GAPDH | | Probe | | | 5’ -FAM-CCCCTCTACCTCCCTCCCCACCTTGA-TAMRA-3’ | |
| Forward | | | 5’ -GGCTCCCACCTTTCTCATCC-3’ | |
| Reverse | | | 5’-GCAGCGTACTCCCCACATC-3’ | |
|  | |  | | |  | |
| **Gene** | |  | | | **Sequences (SYBR Green)** | |
| HGF  GAPDH | | Forward  Reverse  Forward  Reverse | | | 5’-GGGACAAAGGAAAAGAAGAAA-3’  5’-GAATGGAAGTCCTTTATTCCTAGTACA-3’  5’ -GGCTCCCACCTTTCTCATCC-3’  5’-GCAGCGTACTCCCCACATC-3’ | |
| **(B) mRNA expression assay** | | | | | |
| **Gene** | | | **TaqMan assay** | | |
| IGF-1R | | | Hs00609571_m1 | | |
| ALDH1A1 | | | Hs00946916_m1 | | |
| SMO | | | Hs00170665_m1 | | |
| ABCG2 | | | Hs01053790_m1 | | |
| GAPDH | | | Hs99999905_m1 | | |

| **Gene** |  | **Sequences** |
| --- | --- | --- |
| HGF | Probe | 5’-FAM-ATCCGCCAGCCCGTCCAGCA-TAMRA-3’ |
| Forward | 5’-ATTCTTTCACCCAGGCATCTCC-3’ |
| Reverse | 5’-CTGGCAGGAGTTTGGTCACC-3’ |
| GAPDH | Probe | 5’ -FAM-CCCCTCTACCTCCCTCCCCACCTTGA-TAMRA-3’ |
| Forward | 5’ -GGCTCCCACCTTTCTCATCC-3’ |
| Reverse | 5’-GCAGCGTACTCCCCACATC-3’ |
