# Supplementary material for: Non–Small Cell Lung Cancer Cells Acquire Resistance to the ALK Inhibitor Alectinib by Activating Alternative Receptor Tyrosine Kinases
Source: Oxford University Press journal article supplement (doi:10.1158/0008-5472.can-15-1010), 2016-01-11
Supplement: 00085472can151010-sup-148188_2_supp_3229421_nxbzbb.docx [file 00085472can151010-sup-148188_2_supp_3229421_nxbzbb.docx]

| **Antibody** | **Suppliers (Address)** |
| --- | --- |
| EGFR  phospho-EGFR (Tyr1068)  phospho-HER3 (Tyr1289)  IGF-1R  phospho-IGF-1R (Tyr1135/1136)  phospho-MET (Tyr1234/1235) (D26)  phospho-ALK (Tyr1604)  AKT  phospho-AKT (Ser473)  ERK1/2  phospho-ERK1/2 (Thr202/Tyr204)  GAPDH | Cell Signaling Technology  (Danvers, MA, USA) |
| ALK | Invitrogen (Carlsbad, CA, USA) |
| MET  HER3 | Santa Cruz Biotechnology (Dallas, TX, USA) |
| HGF | R&D Systems (Minneapolis, MN, USA ) |

**Table S1. Antibodies**
